# Supplementary material for: Electrodeposition of luminescent composite metal coatings containing rare-earth phosphor particles
Source: Royal Society of Chemistry journal article supplement (doi:10.1039/c2jm13925a), 2012-01-01

# **Electrodeposition of luminescent composite metal coatings containing rare-earth phosphor particles**

Murugan Ganapathi, Svetlana V. Eliseeva, Neil R. Brooks, Dimitri Soccol,

Jan Fransaer, Koen Binnemans\*

**Electronic supplementary information (ESI)**

Figure S1. Cyclic voltammogram of an electrolyte with composition 0.593:0.391:0.016 mole fractions of acetamide-DMSO<sub>2</sub>-NiCl<sub>2</sub> on a Pt electrode at 130 °C.

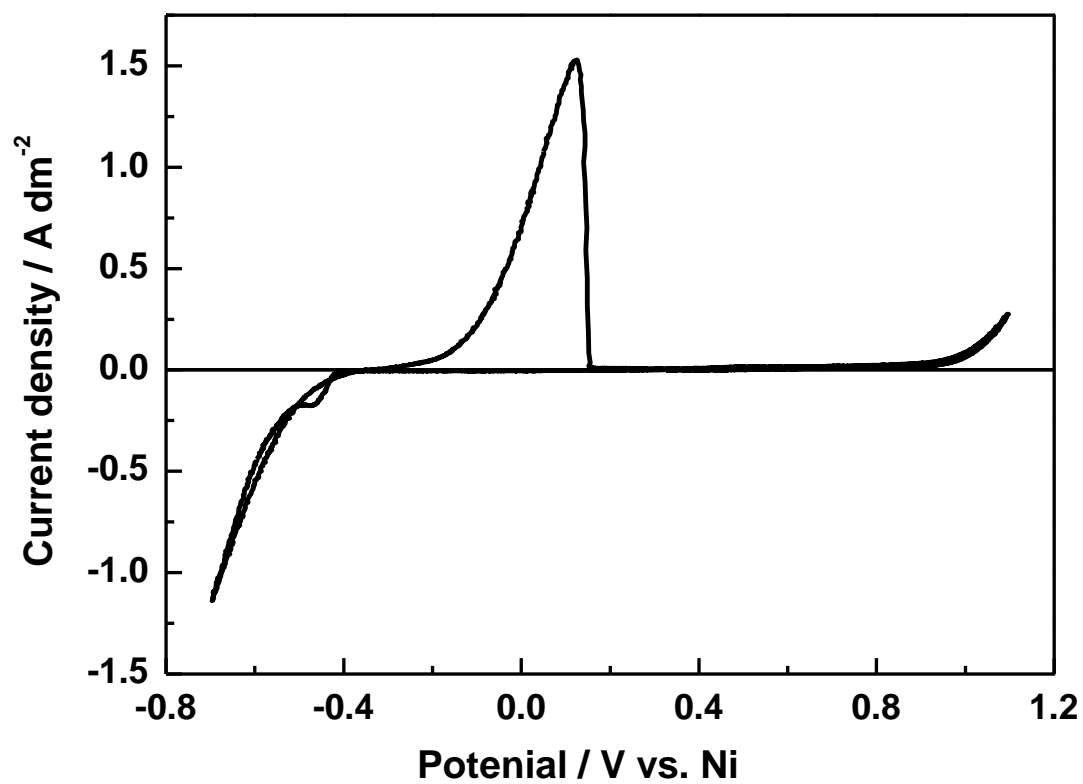

Figure S2. Cyclic voltammogram of an electrolyte with composition 0.617:0.366:0.017 mole fractions of acetamide-DMSO<sub>2</sub>-CoCl<sub>2</sub> on a Pt electrode at 130 °C.

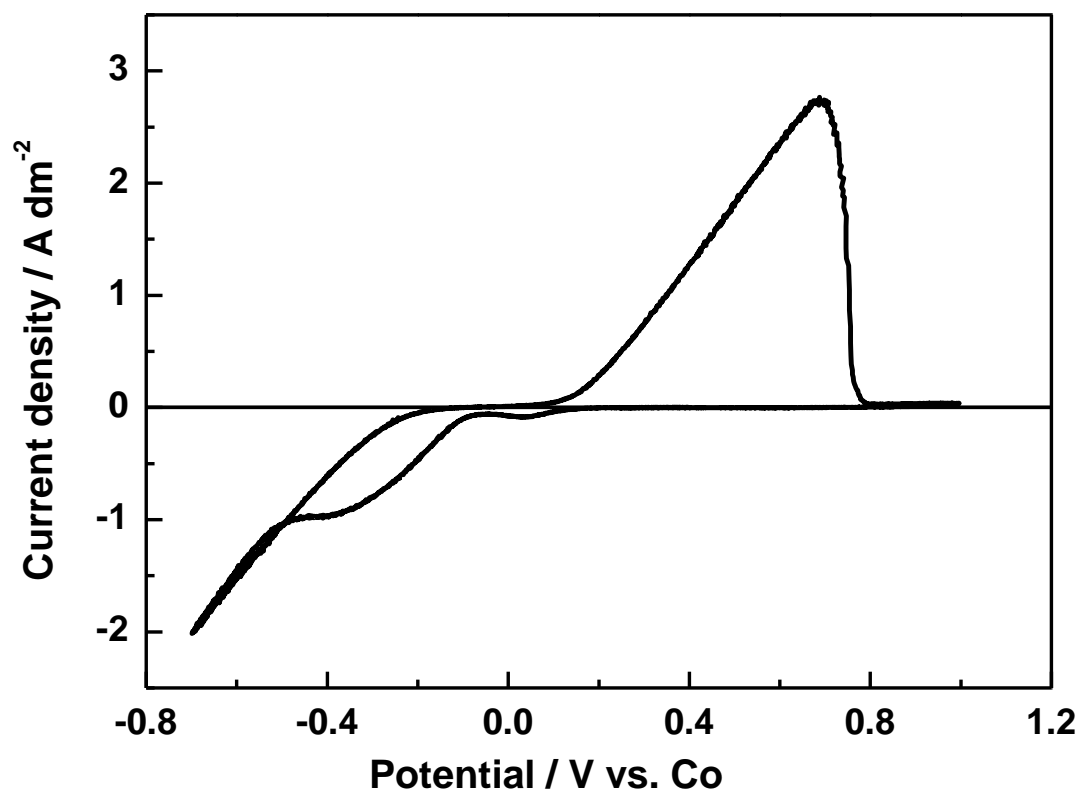

Figure S3. SEM pictures of Ni-Y<sub>2</sub>O<sub>3</sub> coatings, electrodeposited from electrolyte solutions with different concentration of Y<sub>2</sub>O<sub>3</sub> (For experimental conditions: see Table 1)

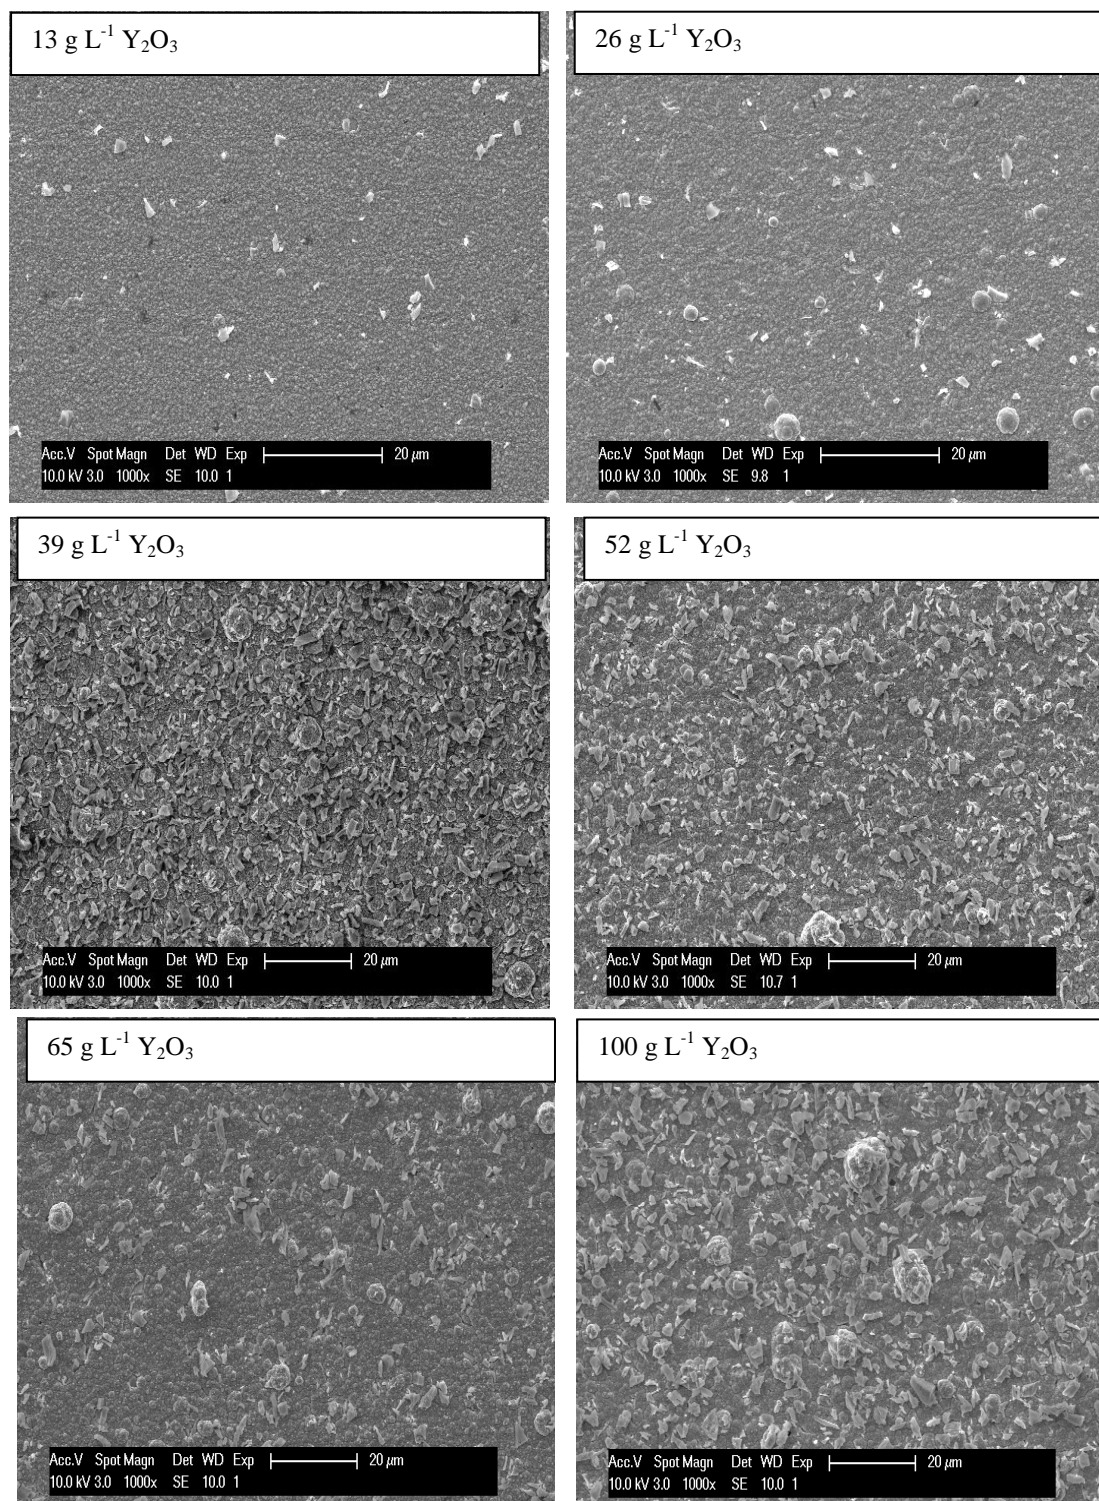

Figure S4. SEM pictures of Ni-Y<sub>2</sub>O<sub>3</sub> coatings, electrodeposited from electrolyte solutions with different concentration of Y<sub>2</sub>O<sub>3</sub> (For experimental conditions: see Table 1). The coatings are the same as those shown in Figure S3, but at a different magnification.

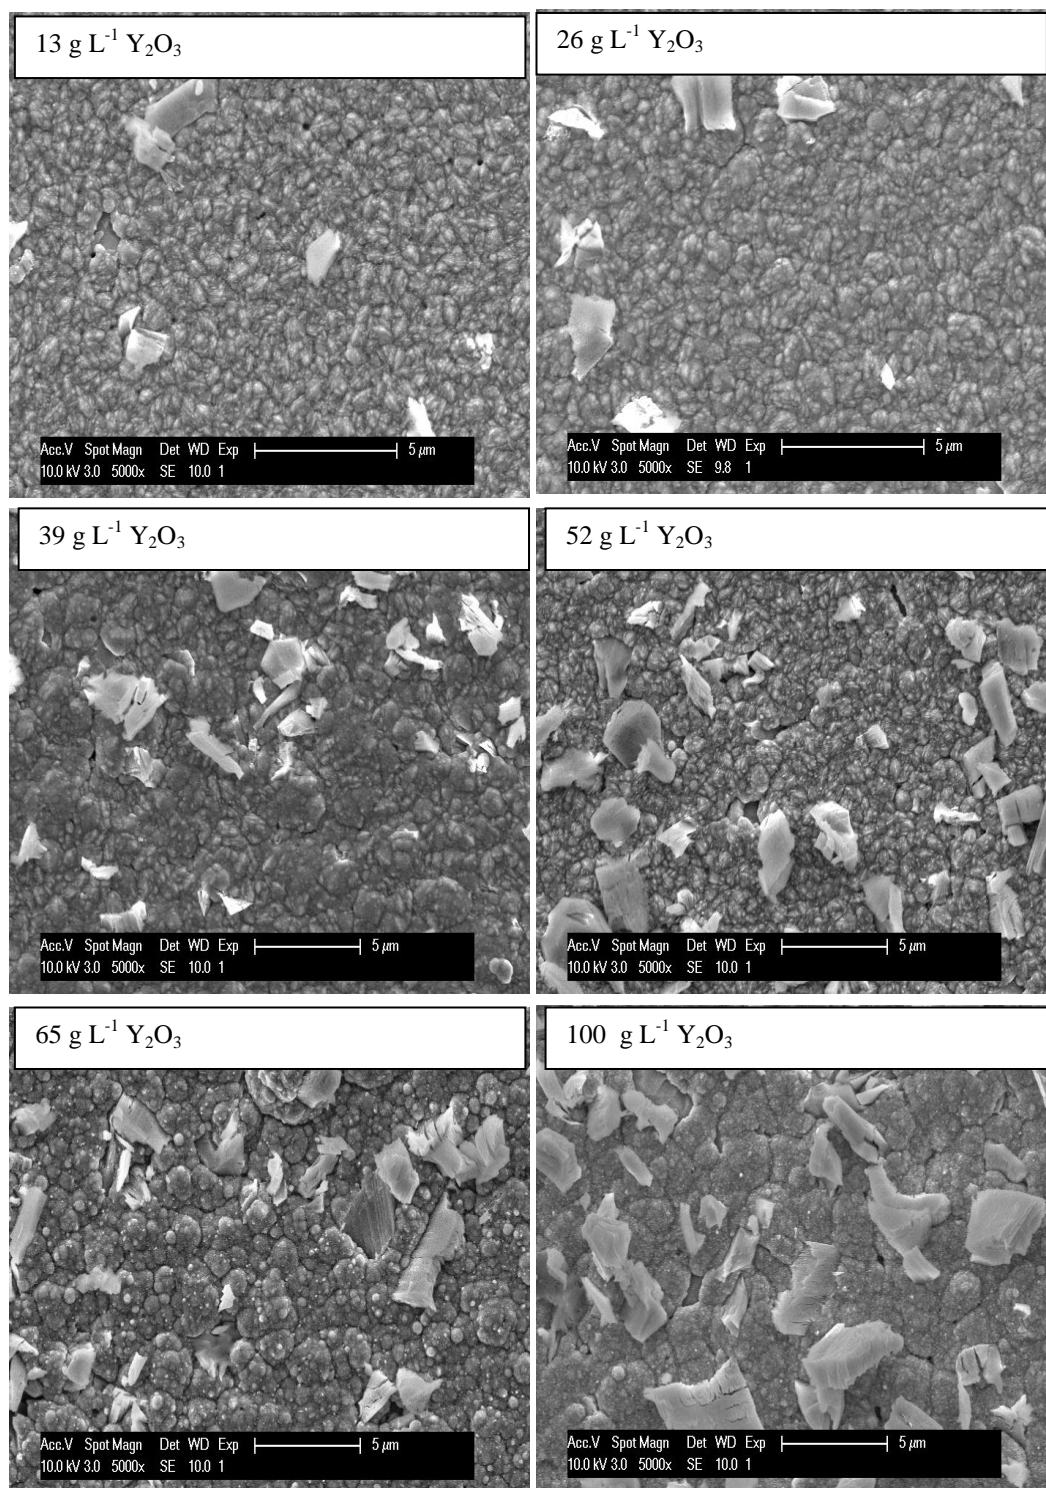

Table S1. Effect of the deposition potential on the loading of  $\text{Y}_2\text{O}_3$  particles (at 130 °C).

| Potential vs. Ni<br>(V) | atomic % of O | atomic % of Y | atomic % of Ni | vol. % of $\text{Y}_2\text{O}_3$ |
|-------------------------|---------------|---------------|----------------|----------------------------------|
| -0.2                    | 14.5          | 9.1           | 76.4           | 29                               |
| -0.4                    | 19.4          | 15.6          | 65.0           | 45                               |
| -0.8                    | 19.4          | 15.3          | 65.3           | 45                               |

Table S2. Influence of temperature on  $\text{Y}_2\text{O}_3$  codeposition in nickel.<sup>[a]</sup>

| temperature (°C) | atomic % of O | atomic % of Y | atomic % of Ni | vol. % of $\text{Y}_2\text{O}_3$ |
|------------------|---------------|---------------|----------------|----------------------------------|
| 130              | 19.5          | 15.5          | 65.0           | 45                               |
| 150              | 15.3          | 11.3          | 73.4           | 35                               |

<sup>[a]</sup> Deposits obtained at -0.4 V vs. Ni, with stirring (250 rpm), in an electrolyte bath with 100 g  $\text{L}^{-1}$  of  $\text{Y}_2\text{O}_3$ .

Figure S5. Effect of the deposition potential on the morphology of Ni-Y<sub>2</sub>O<sub>3</sub> coatings obtained at 130 °C (SEM pictures at two different magnifications, left and right).

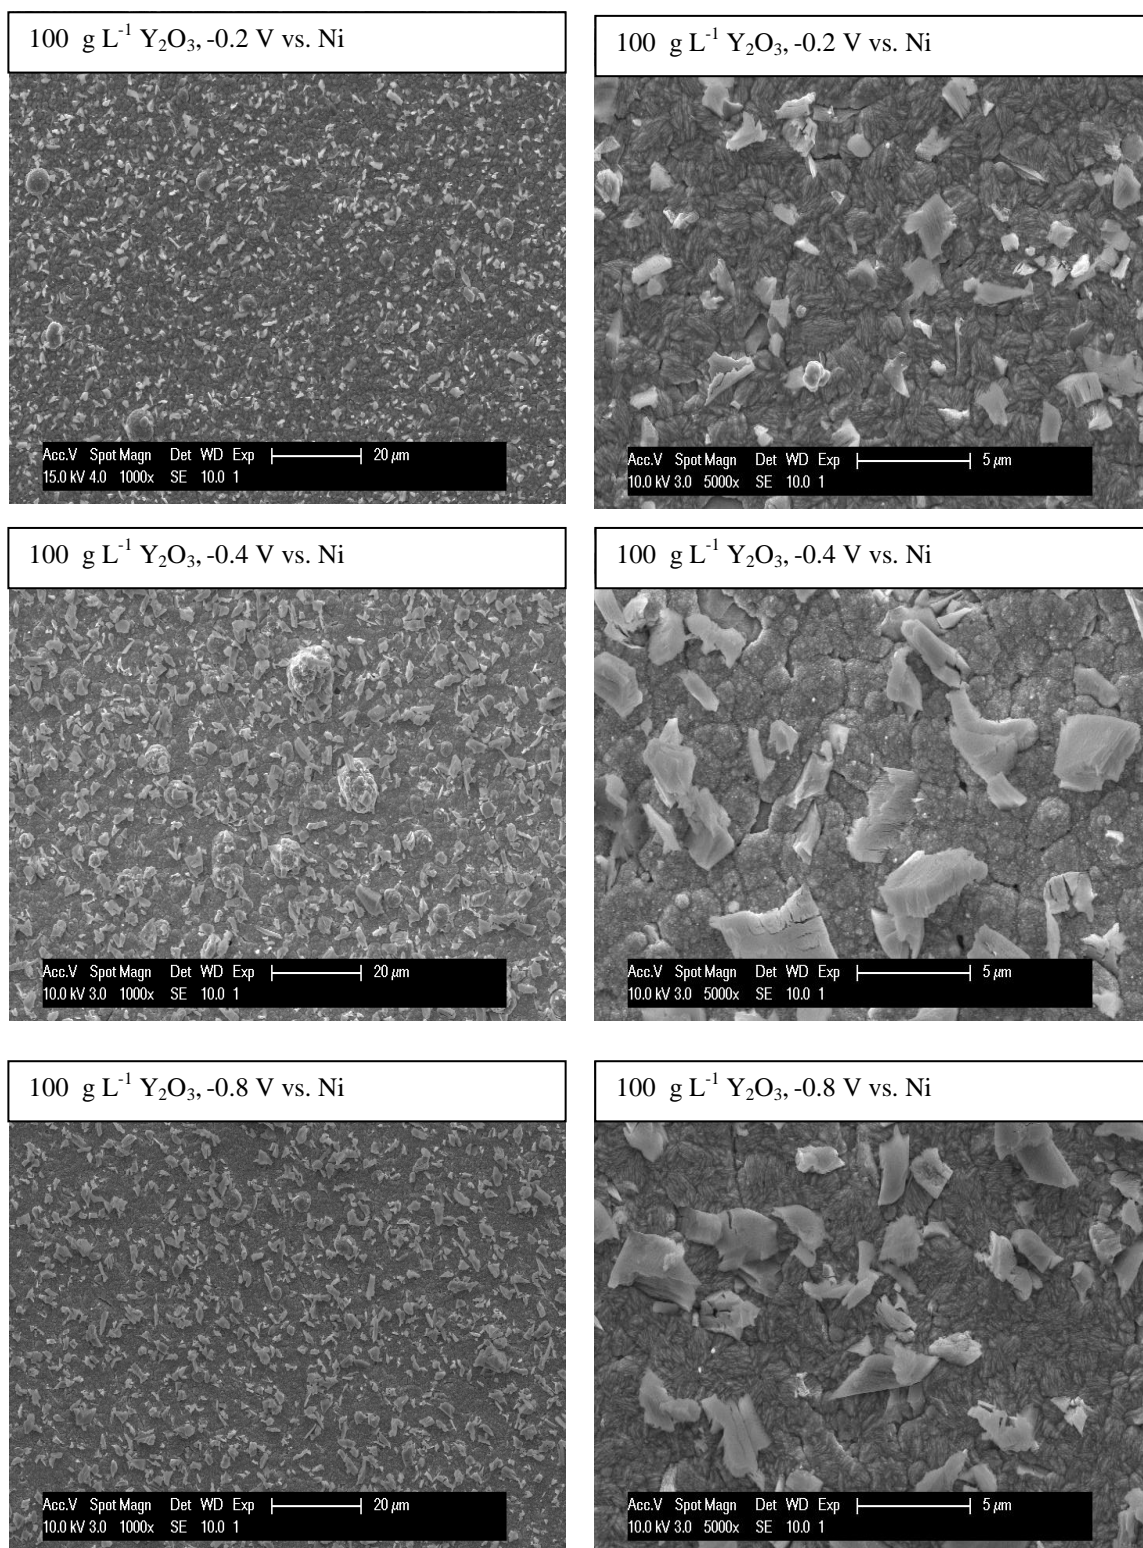

Figure S6. Influence of temperature on  $\text{Y}_2\text{O}_3$  codeposition in nickel. SEM pictures (left) and EDX spectra (right).

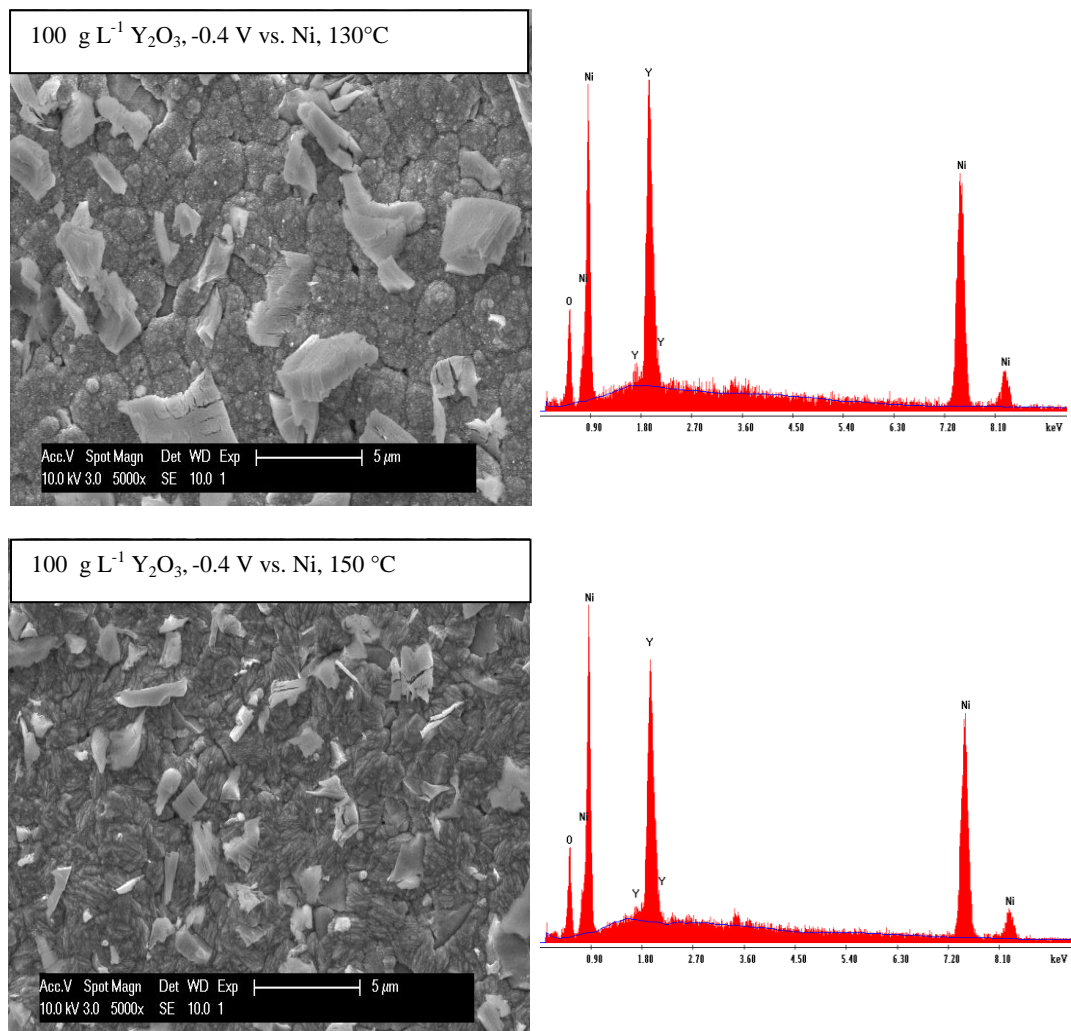

Figure S7. SEM pictures of Co-Y<sub>2</sub>O<sub>3</sub> coatings, electrodeposited from acetamide:DMSO<sub>2</sub>:CoCl<sub>2</sub> electrolyte solutions with different concentration of Y<sub>2</sub>O<sub>3</sub>, and different deposition potentials.

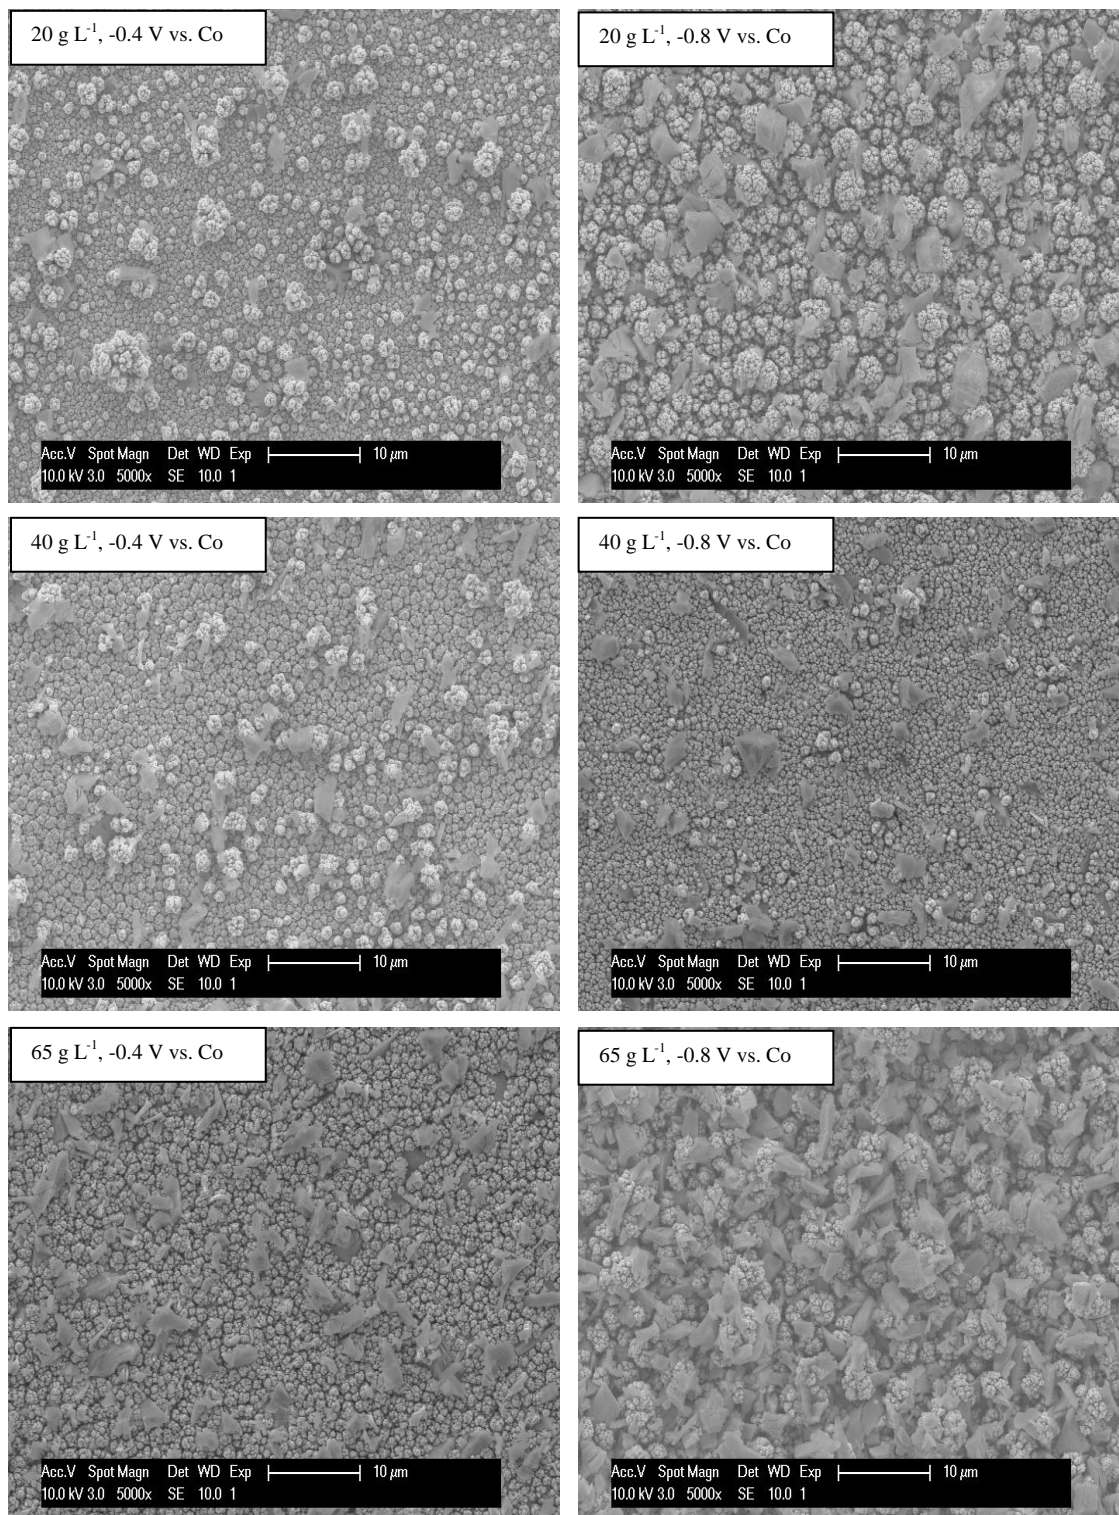

Figure S8. EDX spectrum of a Co-Y<sub>2</sub>O<sub>3</sub> coating.

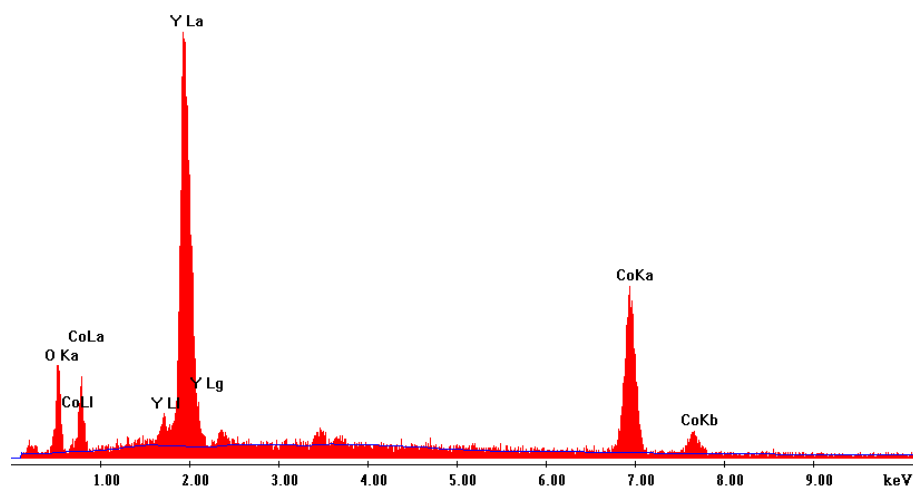

Figure S9. SEM pictures of: (a) Ni coatings with  $\text{Y}_2\text{O}_3:\text{Eu}^{3+}$  phosphor particles, and (c) Ni coatings with  $\text{Gd}_2\text{O}_2\text{S}:\text{Tb}^{3+}$  phosphor particles, deposited at  $-0.4\text{ V}$  vs. Ni at the temperature of  $130\text{ }^\circ\text{C}$ . The electrolyte was stirred at 250 rpm. (b) and (d) are the EDX spectra of (a) and (c), respectively.

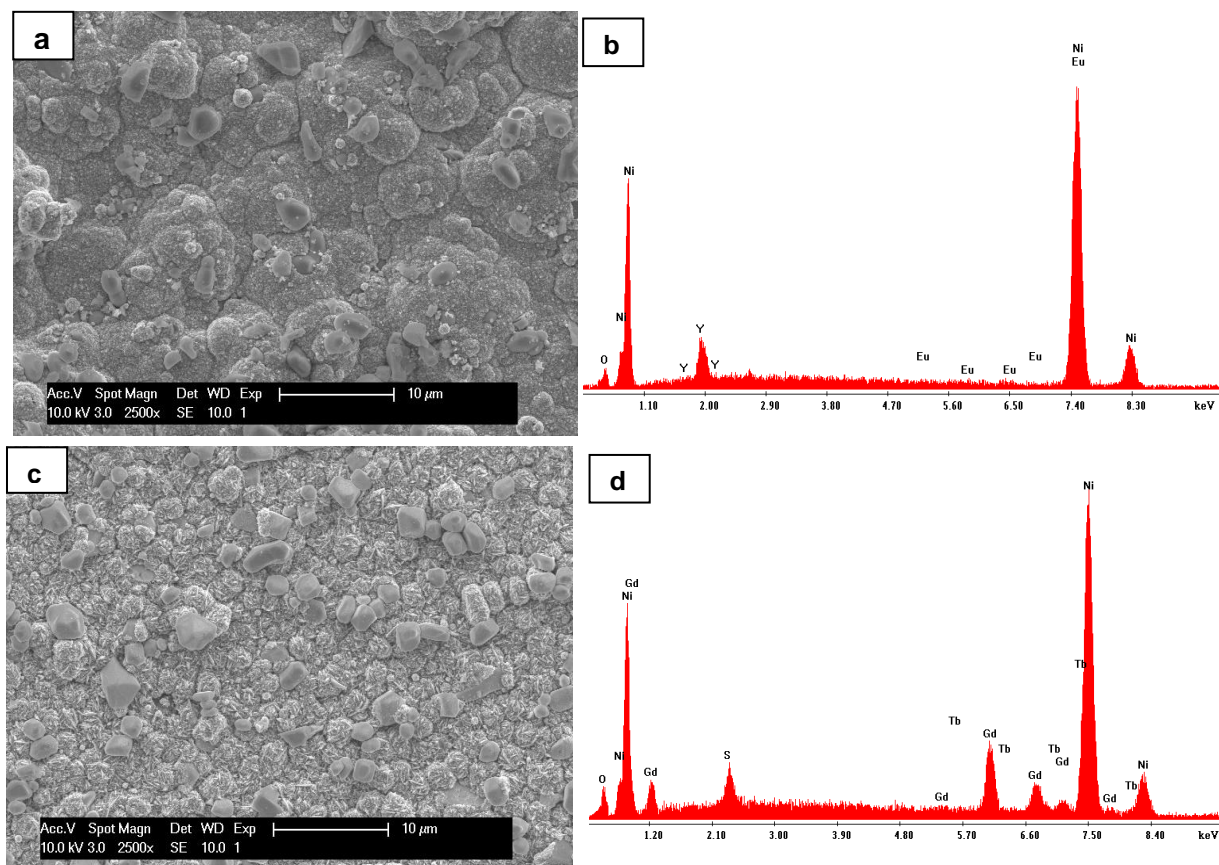

Figure S10. SEM pictures of: (a) Ni coatings with  $\text{BaMg}_2\text{Al}_{16}\text{O}_{27}:\text{Eu}^{2+}$  phosphor particles, and (c) Ni coatings with  $\text{Y}_3\text{Al}_5\text{O}_{12}:\text{Ce}^{3+}$  phosphor particles, deposited at -0.4 V vs. Ni at the temperature of 130 °C . The electrolyte was stirred at 250 rpm. (b) and (d) are the EDX spectra of (a) and (c), respectively.

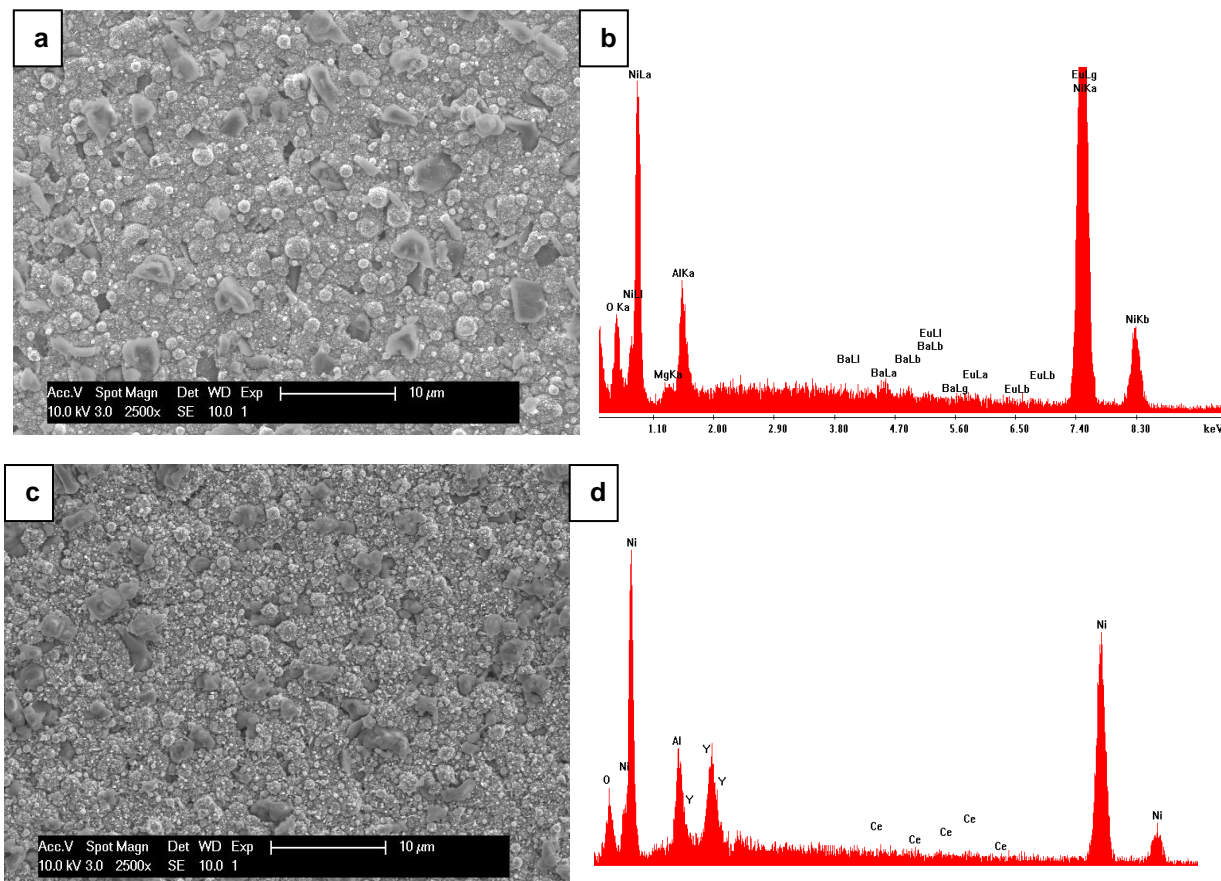

Figure S11. Excitation spectra of  $\text{Eu}_2\text{O}_3$  powder ( $\lambda_{\text{em}} = 611 \text{ nm}$ ) as a function of the thickness of the powder layer.

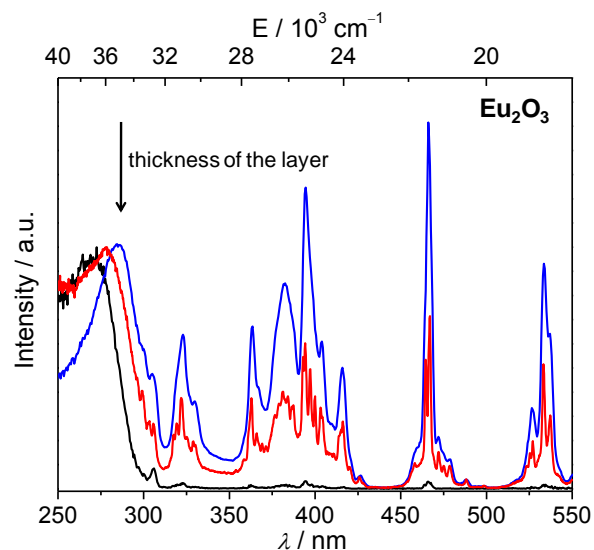

Figure S12. Excitation spectra of  $\text{Gd}_2\text{O}_2\text{S}:\text{Tb}^{3+}$  powder ( $\lambda_{\text{em}} = 545 \text{ nm}$ ) as a function of the thickness of the powder layer.

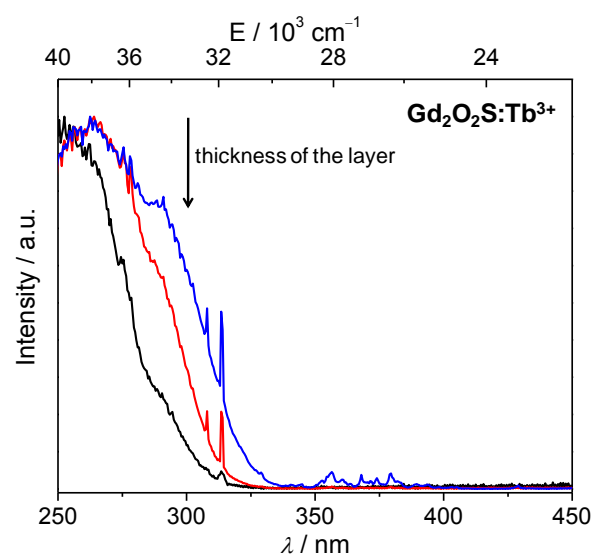

Figure S13. Pictures of a nickel coating with  $\text{Y}_3\text{Al}_5\text{O}_{12}:\text{Ce}^{3+}$  phosphor particles, illuminated (a) by daylight and (b) with UV radiation of 340 nm.

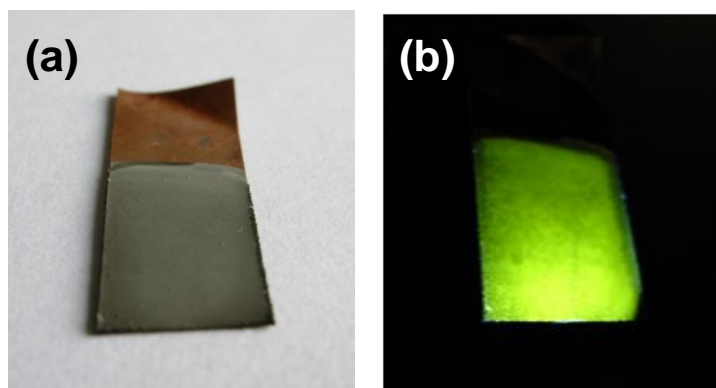

Figure S14. Room temperature luminescence spectra of  $\text{Y}_3\text{Al}_5\text{O}_{12}:\text{Ce}^{3+}$  excited at different wavelengths.

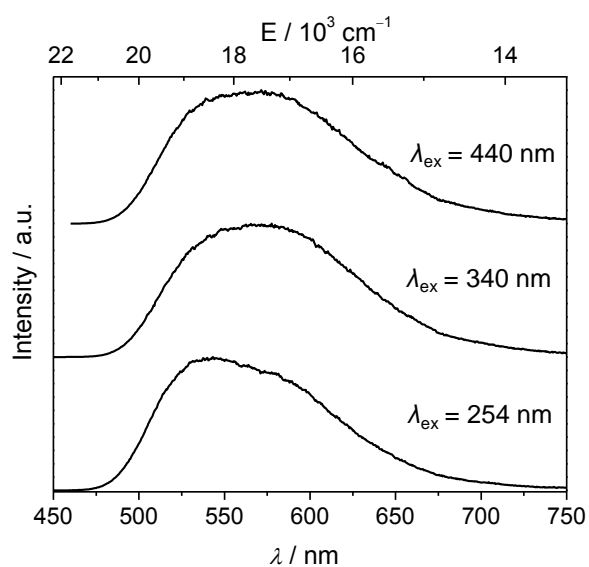

Figure S15. Room temperature emission spectra under excitation at 254 nm of the mixtures of red ( $\text{Y}_2\text{O}_3:\text{Eu}^{3+}$ ) and green ( $\text{Gd}_2\text{O}_2\text{S}:\text{Tb}^{3+}$ ) phosphors in (a) 90:10, (b) 75:25, (c) 50:50, (d) 25:75 and (e) 10:90 wt.% ratio, respectively.

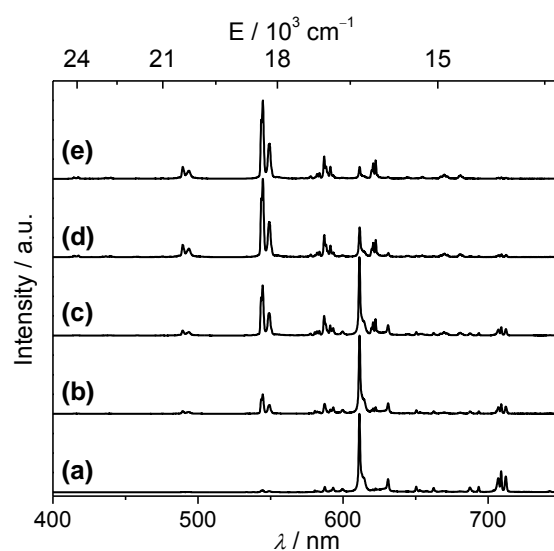

Table S3. Luminescence lifetimes ( $\tau_{\text{obs}}$ , ms) of  $\text{Eu}({}^5\text{D}_0)$  and  $\text{Tb}({}^5\text{D}_4)$  levels for red ( $\text{Y}_2\text{O}_3\text{:Eu}^{3+}$ ) and green ( $\text{Gd}_2\text{O}_2\text{S:Tb}^{3+}$ ) phosphors, the mixtures of them and the corresponding composite Ni coatings.

| Ratio Eu:Tb / wt. % | State      | $\text{Eu}({}^5\text{D}_0)$ | $\text{Tb}({}^5\text{D}_4)$ |
|---------------------|------------|-----------------------------|-----------------------------|
| 100:0               | powder     | 1.04(1)                     | -                           |
|                     | Ni coating | 1.04(1)                     | -                           |
| 90:10               | powder     | 1.03(1)                     | 0.57(1)                     |
| 75:25               | powder     | 1.02(1)                     | 0.56(1)                     |
|                     | Ni coating | 1.00(1)                     | 0.56(1)                     |
| 50:50               | powder     | 1.03(1)                     | 0.56(1)                     |
|                     | Ni coating | 1.02(1)                     | 0.58(1)                     |
| 25:75               | powder     | 1.02(1)                     | 0.58(1)                     |
|                     | Ni coating | 1.00(1)                     | 0.57(1)                     |
| 10:90               | powder     | 1.02(1)                     | 0.57(1)                     |
| 0:100               | powder     | -                           | 0.55(1)                     |
|                     | Ni coating | -                           | 0.55(1)                     |

Table S4. CIE coordinates of the red ( $\text{Y}_2\text{O}_3:\text{Eu}^{3+}$ ) and green ( $\text{Gd}_2\text{O}_2\text{S}:\text{Tb}^{3+}$ ) phosphors, the mixtures of them and the corresponding composite Ni coatings.

| Ratio Eu:Tb / wt. % | State      | (x; y)       |
|---------------------|------------|--------------|
| 100:0               | powder     | 0.652; 0.345 |
|                     | Ni coating | 0.638; 0.346 |
| 75:25               | powder     | 0.563; 0.408 |
|                     | Ni coating | 0.578; 0.401 |
| 50:50               | powder     | 0.515; 0.464 |
|                     | Ni coating | 0.489; 0.471 |
| 25:75               | powder     | 0.414; 0.522 |
|                     | Ni coating | 0.410; 0.523 |
| 0:100               | powder     | 0.411; 0.537 |
|                     | Ni coating | 0.373; 0.568 |

Figure S16. Room-temperature emission spectra of (a) the 50:50 wt.% mixture of blue and yellow phosphors and (b) the corresponding Ni coating. Black lines:  $\lambda_{\text{ex}} = 254$  nm, green lines:  $\lambda_{\text{ex}} = 340$  nm.

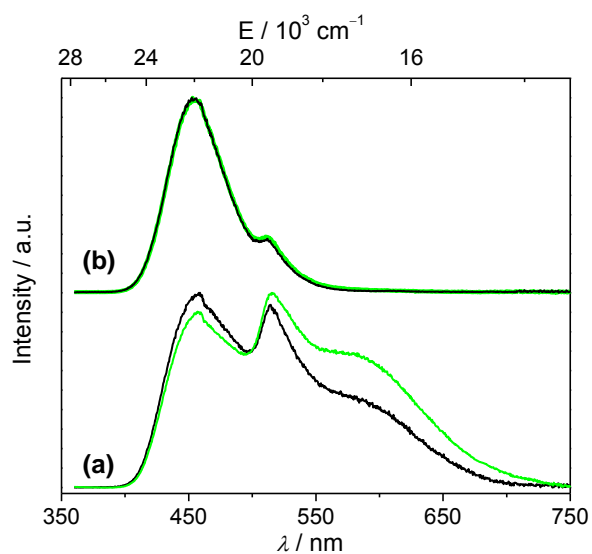

Figure S17. (Left) Photograph of the powder of 50:50 wt.% mixture of yellow (YAG: Ce<sup>3+</sup>) and blue (BAM: Eu<sup>2+</sup>) phosphors and the corresponding composite Ni coating under 254 nm excitation and (right) CIE trichromatic coordinates (circles: powder, triangles: Ni coating; black:  $\lambda_{\text{ex}} = 254$  nm, red:  $\lambda_{\text{ex}} = 340$  nm).

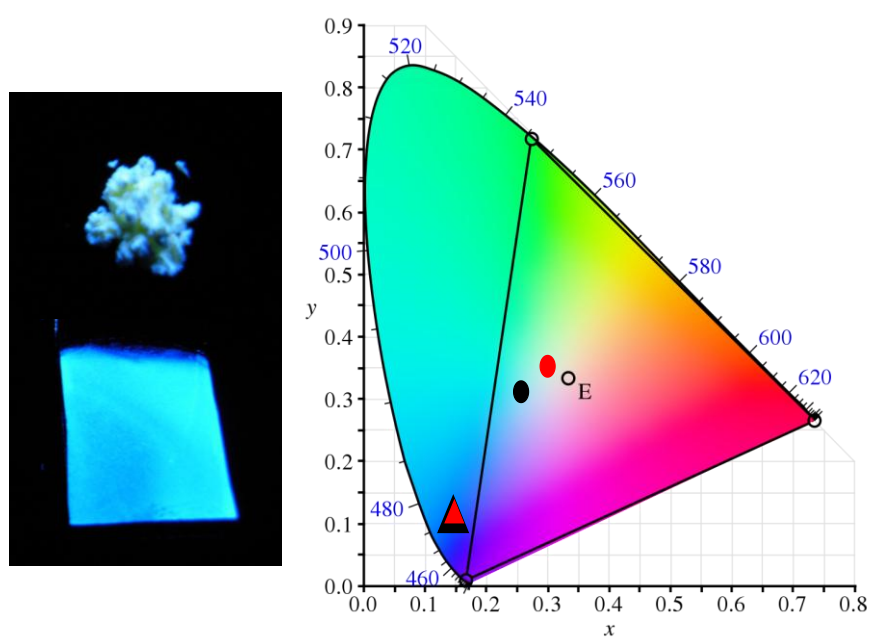

Figure S18. SEM pictures (two different magnifications) and EDX spectrum of binary mixtures of the red ( $\text{Y}_2\text{O}_3:\text{Eu}^{3+}$ ) and green ( $\text{Gd}_2\text{O}_2\text{S}:\text{Tb}^{3+}$ ) phosphors, co-deposited with Ni at -0.4 V vs. Ni.

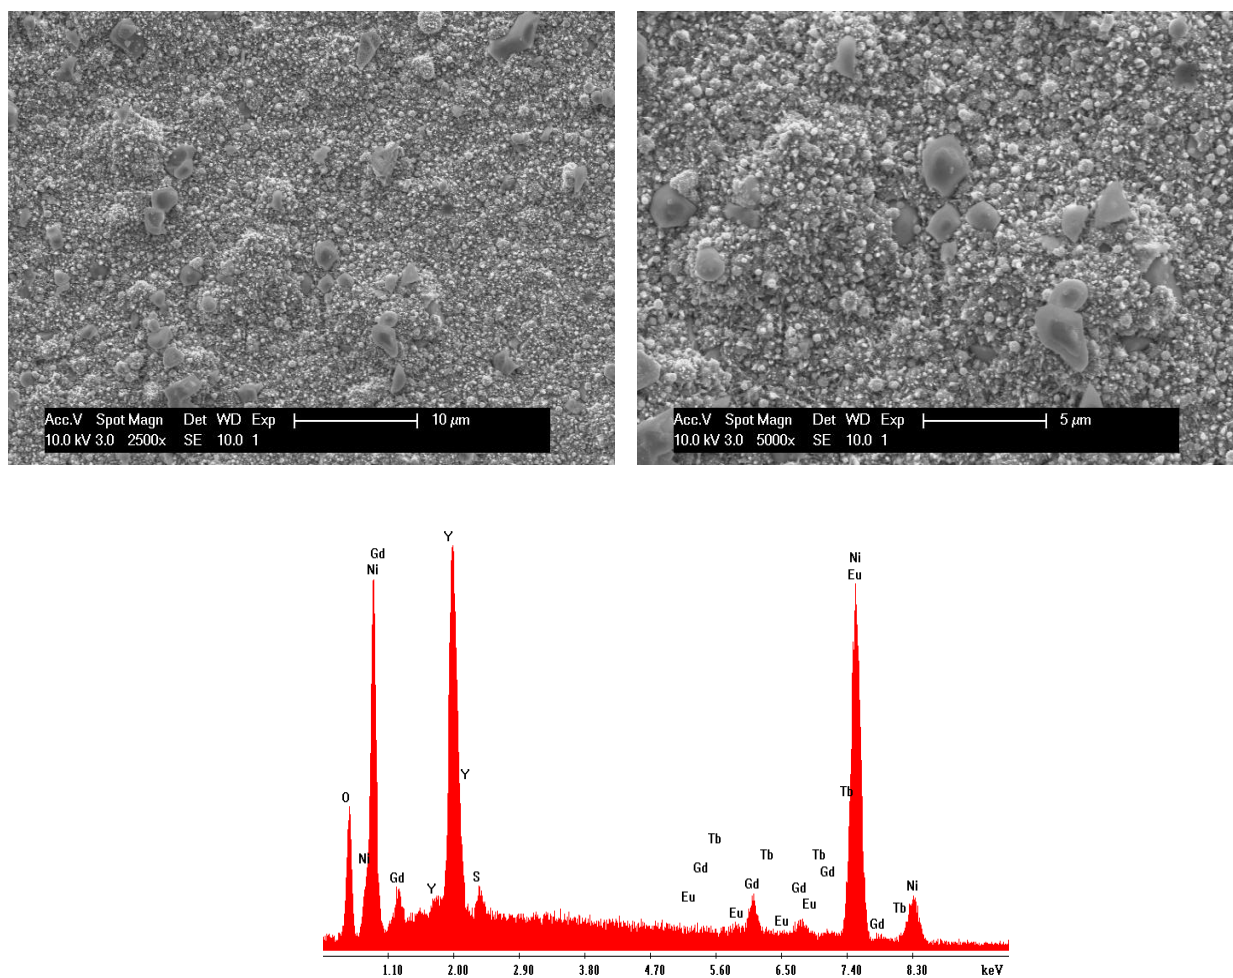

Supplement: c2jm13925a.pdf [file c2jm13925a.pdf]
